# Supplementary material
Source: publisher figshare collection journal article supplement (https://frontiersin.figshare.com/ndownloader/files/28923096)
Supplement: Supplementary file 1 [file 28923096]

## Sheet: Sheet1
Table S1. Orthoreoviruses used in the phylogenetic and genetic analyses.
Virus name	Serotype	Strain	Host	Country	GenBank accession numbers by proteins (segments)
					Lambda 1 (L3)	Lambda 2 (L2)	Lambda 3 (L1)	Mu 1 (M2)	Mu 2 (M1)	Mu NS (M3)	Sigma 1 (S1)	Sigma 2 (S2)	Sigma 3 (S4)	Sigma NS (S3)
Mammalian orthoreovirus	1	HB-A	Mink	China	KC462151	KC462150	KC462149	KC462153	KC462152	KC462154	KC462155	KC462156	KC462158	KC462157
Mammalian orthoreovirus	1	WIV2	Rickett's big-footed bat	China	KT444524	KT444523	KT444522	KT444526	KT444525	KT444527	KT444528	KT444529	KT444531	KT444530
Mammalian orthoreovirus	1	B/03	short-nosed fruit bat	China	KX263309	KX263308	KX263307	KX263311	KX263310	KX263312	KX263313	KX263314	KX263316	KX263315
Mammalian orthoreovirus	1	Lang	Human	USA	AF129820	AF378003	M24734	AF490617	AF461682	AF174382	EF494445	L19774	M13139	M14325
Mammalian orthoreovirus	2	WIV4	Bat	China	KT444534	KT444533	KT444532	KT444536	KT444535	KT444537	KT444538	KT444539	KT444541	KT444540
Mammalian orthoreovirus	2	MRV2Tou05	Human	France	GU196308	GU196307	GU196306	GU196310	GU196309	GU196314	GU196315	GU196311	GU196313	GU196312
Mammalian orthoreovirus	2	TRALAU2004	Bank vole	Germany	JX204740	JX204739	JX204738	JX204742	JX204741	JX204743	JX204737	JX204744	JX204746	JX204745
Mammalian orthoreovirus	2	MORV/47Ma/06	Common vole	Hungary	KX384848	KX384847	KX384846	KX384850	KX384849	KX384851	KX384852	KX384853	KX384855	KX384854
Mammalian orthoreovirus	2	Jones	Human	USA	AF129821	AF378005	M31057	M19355	AF124519	AF174383	M10261	L19775	X60066	M18390
Mammalian orthoreovirus	3	GD-1	Pig	China	JX486059	JX486058	JX486057	JX486061	JX486060	JX486062	JX486063	JX486064	JX486066	JX486065
Mammalian orthoreovirus	3	SD-14	Mink	China	KT224506	KT224505	KT224510	KT224508	KT224507	KT224509	KT224510	KT224511	KT224513	KT224512
Mammalian orthoreovirus	3	WIV7	Bat	China	KT444554	KT444553	KT444552	KT444556	KT444555	KT444557	KT444558	KT444559	KT444561	KT444560
Mammalian orthoreovirus	3	SC-A	Pig	China	EF029088	DQ885990	DQ997719	DQ482462	DQ396804	DQ403254	DQ911244	DQ396805	DQ396806	DQ411553
Mammalian orthoreovirus	3	MPC/04	Masked palm civet	China	NC_013229	NC_013226	NC_013225	NC_013228	NC_013227	NC_013230	NC_013231	NC_013232	NC_013234	NC_013233
Mammalian orthoreovirus	3	Dearing	Human	USA	HM159615	HM159614	EF494435	HM159617	HM159616	HM159618	HM159619	HM159620	HM159622	HM159621
Mammalian orthoreovirus	3	R124	Human	USA	GU991661	GU991660	GU991659	GU991663	GU991662	GU991664	GU991665	GU991666	GU991668	GU991667
Mammalian orthoreovirus	3	Abney	Human	USA	GU589579	GU589578	GU589577	GU589581	GU589580	GU589582	GU589583	GU589584	GU589586	GU589585
Mammalian orthoreovirus	4	Ndelle	House mouse	Cameroon	N/A	N/A	AF368033	AF368034	N/A	N/A	AF368035	AF368036	AF368037	N/A
Phocid orthoreovirus 1	N/A	PhRV1/Phoca vitulina/USA/2007-2008	Harbor seal	USA	MN820531	MN820530	MN820529	MN820533	MN820532	MN820534	MN820535	MN820536	MN820538	MN820537
Nelson Bay orthoreovirus	N/A	N/A	Grey-headed flying fox	Australia	JF342674	JF342672	JF342673	JF342676	JF342675	JF342677	AF218360	AF059718	AF059722	AF059726
Pulau orthoreovirus	N/A	N/A	Small flying fox	Malaysia	NC_038662	NC_038665	NC_038660	NC_038664	NC_038661	NC_038666	NC_038667	NC_038659	NC_038658	NC_038663
Pteropine orthoreovirus	N/A	Garut-69	Large flying fox	Indonesia	LC389093	LC389091	LC389092	LC389089	LC389088	LC389090	LC389084	LC389085	LC389087	LC389086
Steller sea lion reovirus	N/A	N/A	Steller sea lion	USA	HM222978	HM222979	HM222980	HM222976	HM222977	HM222975	HM222974	HM222973	HM222972	HM222971
Avian orthoreovirus	N/A	C-98	Red junglefowl	China	EU616737	JN641888	EU616735	EU616741	EU616740	EU616744	EF057397	JN641886	EF030496	JN641885
Muscovy duck reovirus	N/A	ZJ2000M	Muscovy duck	China	KF306082	KF306084	KF306083	KF306086	KF306085	KF306087	KF306091	KF306088	KF306089	KF306090
Mahlapitsi virus	N/A	624	Bat fly	South Africa	KU198612	KU198613	KU198614	KU198616	KU198615	KU198617	KU198621	KU198618	KU198619	KU198620
Reptilian orthoreovirus	N/A	47/02	Green bush viper	Germany	KC852153	KC852155	KC852154	KC852157	KC852156	KC852158	KC852161	KC852159	KC852160	KC852162
Baboon orthoreovirus	N/A	N/A	Yellow baboon	USA	NC_015879	NC_015877	NC_015878	NC_015881	NC_015880	NC_015882	NC_015885	NC_015883	NC_015884	NC_015886
